# Supplementary material
Source: Elsevier journal article supplement (https://www.sciencedirect.com/science/article/pii/S2529849622000831)
Supplement: mmc1 [file S2529849622000831:mmc1.doc]

**Supplemental Digital Content 1. Description of the studied scales**

*Allen-Ferguson classification*

With this method, fractures were classified into groups depending on the mechanism of damage and the direction of traumatic action (combination of 4 main vectors - flexion, extension, compression, distraction).

Compression-flexion injuries (CF) include 5 stages, depending on the degree of damage to the vertebral body and distraction of the structures of the posterior support complex.

Distraction-flexion injuries (DF) are characterized by a rupture of the posterior ligamentous apparatus with an anterior displacement. A fracture of the body of the underlying vertebra may occur in the last stages of dislocation. DF includes 4 stages.

Compression-extension injuries (CE) are characterized by fractures of the posterior structures of the vertebrae, against which a dislocation of the overlying vertebra is formed due to the compression and extension mechanism. Spinous processes with adjacent fragments of arches remain in place. CE includes 5 stages.

Compression injuries (VC) are formed due to vertical compression. The posterior structures remain intact. VC includes 3 stages.

Distraction-extension injuries (DE) are characterized primarily by damage to the ligamentous apparatus of the anterior pillars of the cervical spine with the displacement of the overlying segment posteriorly. DE includes 2 stages.

Hyperlateroflexion injuries (LF) develop due to excessive lateral flexion of the head and includes 2 stages. The damage line is localized near the uncovertebral joints and may affect the pedicle and lateral mass of the vertebra.

*Harris scheme*

This technique classifies fractures into groups depending on the direction of the main vector of traumatic impact. Though not assessed by our study, authors included upper cervical spine fractures in this classification.

The main groups were: hyperflexion injuries (5 subtypes for the C3-C7 injury), vertical compression fractures (1 subtype for C3-C7), hyperextension injuries (3 subtypes for the C3-C7), flexion-rotational injuries (1 subtype), extension-rotational injuries (1 subtype), hyperlateroflexional fractures (1 subtype).

*Argenson classification*

Compression injuries (type A) were characterized by the damage to the vertebral bodies and included 3 subgroups.

Distraction injuries (type B) were divided into 2 subtypes - flexion-distraction (subtype BF) and extension-distraction (subtype BE), each of which included 3 stages with gradual sequential involvement in the damage of the next vertebral column and various degrees of involvement in damage to the posterior longitudinal ligament.

Rotational injuries (type C) were categorized separately; they include 3 subtypes with rotation with or without facet fracture.

*AOSpine classification*

Compression injuries (type A) are characterized by localization of damage in the area of vertebral bodies of various degrees and include 5 subtypes.

Distraction fractures (type B) are characterized by damage to the anterior or posterior structures (3 subtypes) against the background of excessive flexion or extension.

Translation of a vertebra (type C) involves complete separation of one vertebra from another with dislocation in any direction or angular deformity.

Facet damage (type F) is assessed with isolated joint damage or in conjunction with types A, B, and C. It includes 4 subtypes.

*SLIC scale*

The main aspect of this scale is a simultaneous score assessment of the damage morphology, the integrity of the disco-ligamentous complex and the degree of damage to neural structures. If the sum of points is 5 or more, then surgical treatment is indicated. If the sum is 3 or less, conservative therapy is preferable. With a value of 4, the choice is based on the experience of the surgeon and taking into account the condition and individual characteristics of the patient.

*CSISS scale*

The main purpose of this scale is to determine the patient's treatment tactics at the stage of performing computed tomography (CT) of the cervical spine. Authors identified 4 anatomical zones. Based on CT data in axial and sagittal reconstructions, the damage is evaluated in points according to an analog scale. Bone damage is estimated according to the amount of displacement of the fragments. Ligament damage is assessed based on the degree of discrepancy between the corresponding bone landmarks: 0 points – no damage. 1 point-damage without displacement. 5 points – maximum possible damage. Intermediate points of ligamentous apparatus damage are set in accordance with the opinion of the surgeon.

The points of all 4 zones are added together. The maximum amount of points is 20. If the value is 7 or more, surgical treatment is indicated, and if the amount is less than 7, conservative therapy is indicated.
